# Supplementary material
Source: Springer Nature journal article supplement (https://www.springermedizin.de/resource/supplementary/12865_2005_81_MOESM3_ESM.pdf/9428468)

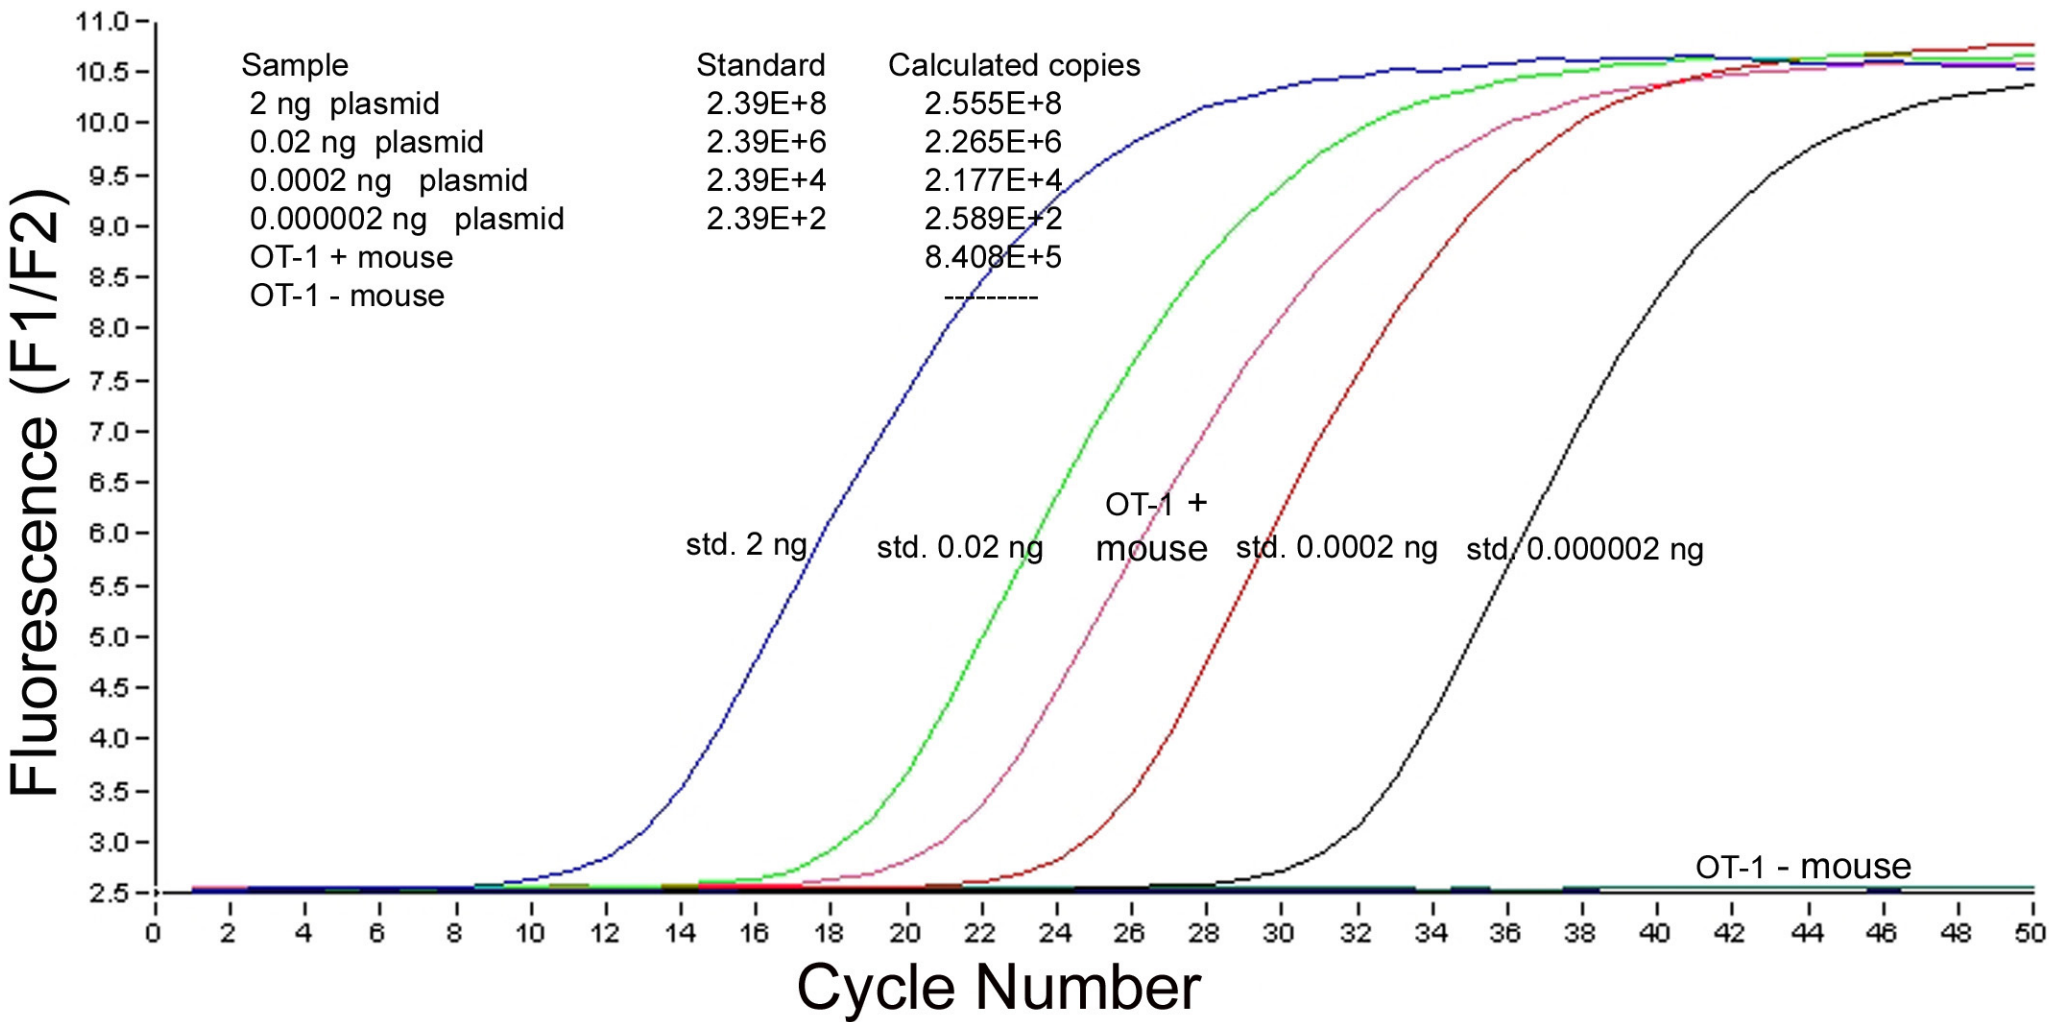

Fluorescence (F1/F2)

Cycle Number

std. 2 ng    std. 0.02 ng    OT-1 + mouse    std. 0.0002 ng    std. 0.000002 ng

OT-1 - mouse

Supplement: MOESM3 [file 9428468]
